# Supplementary material for: Genetic Analysis of Hematological Parameters in Incipient Lines of the Collaborative Cross
Source: Oxford University Press journal article supplement (doi:10.1534/g3.111.001776), 2012-02-01
Supplement: 157_001776si.pdf [file 157_001776si.pdf]

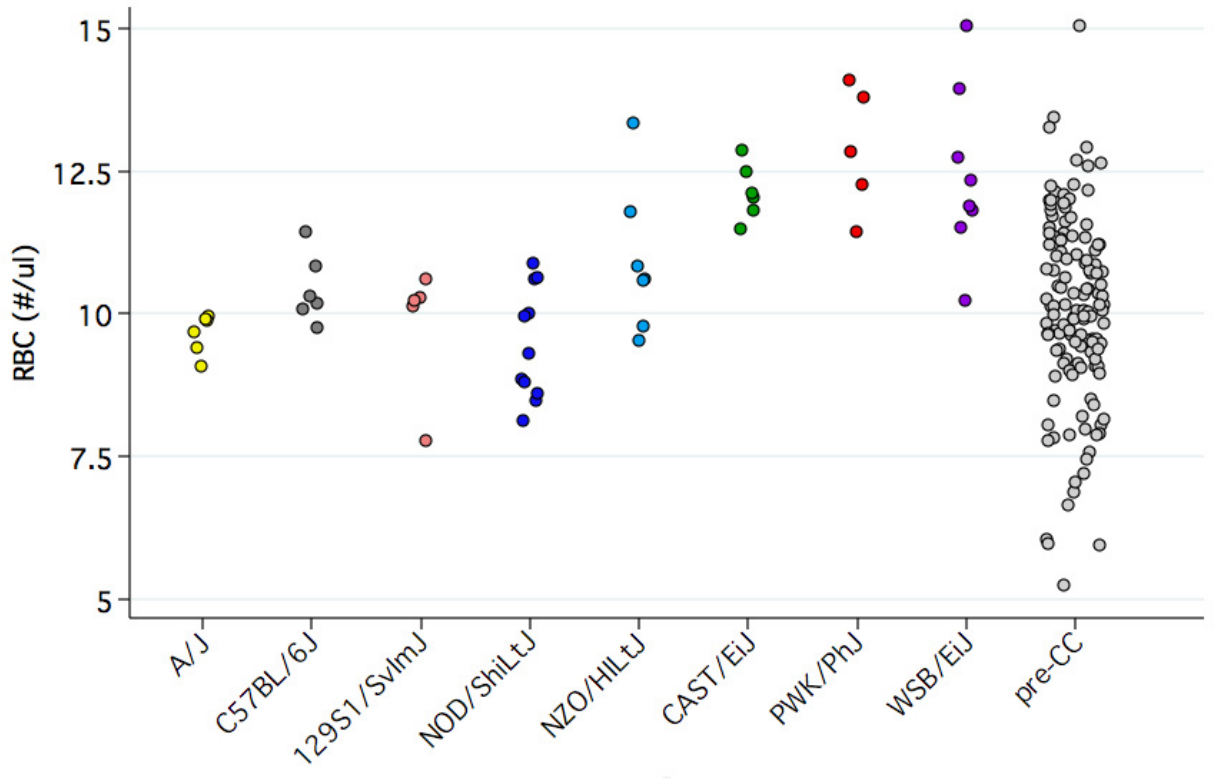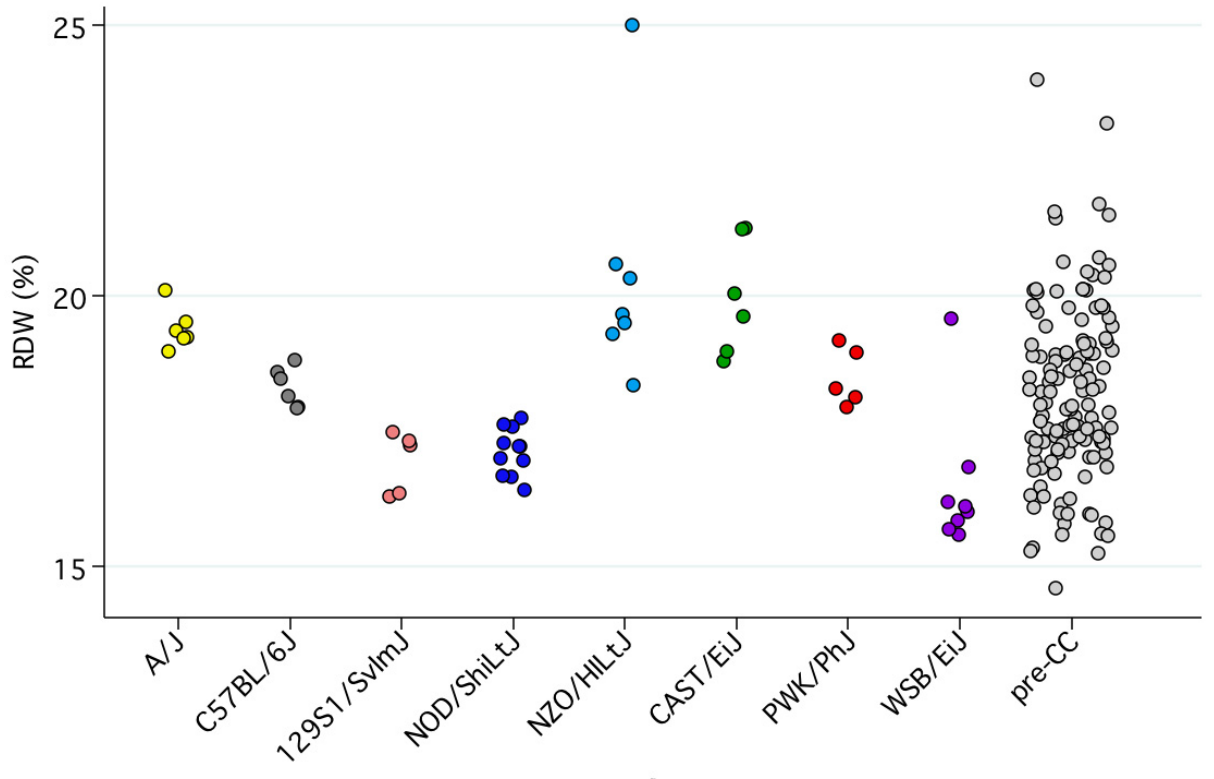

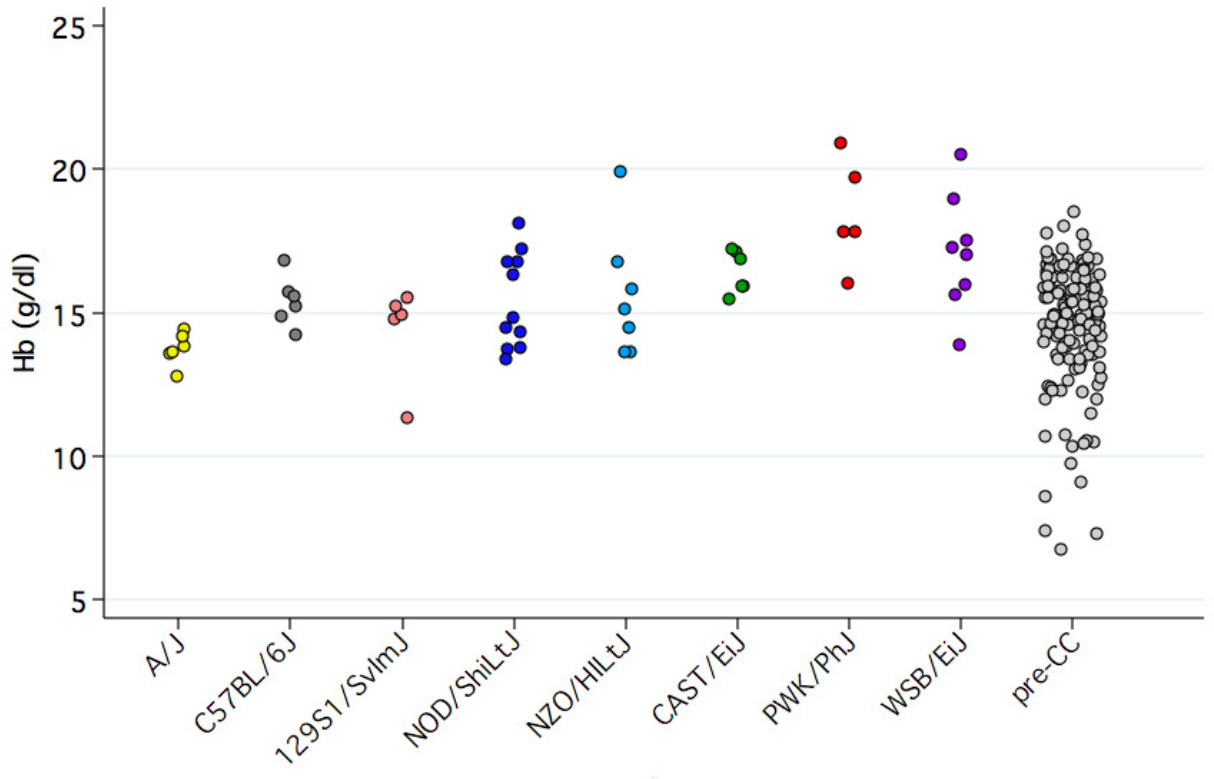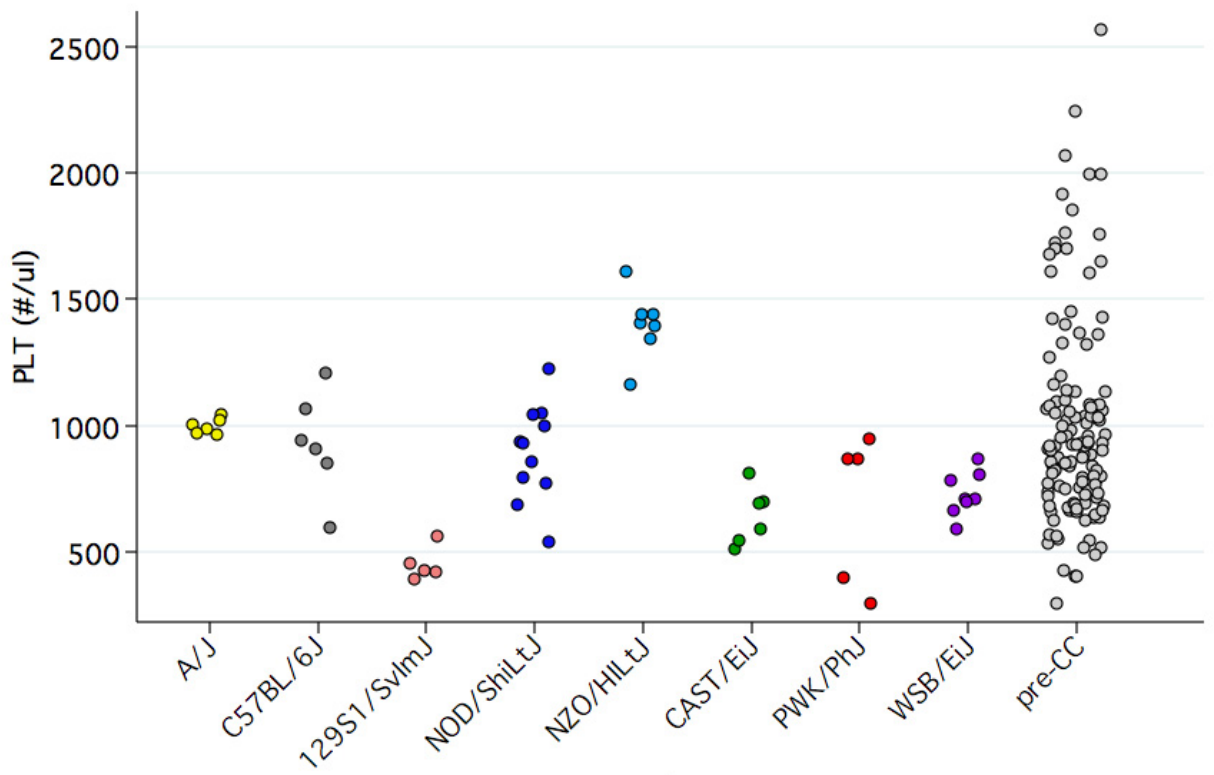

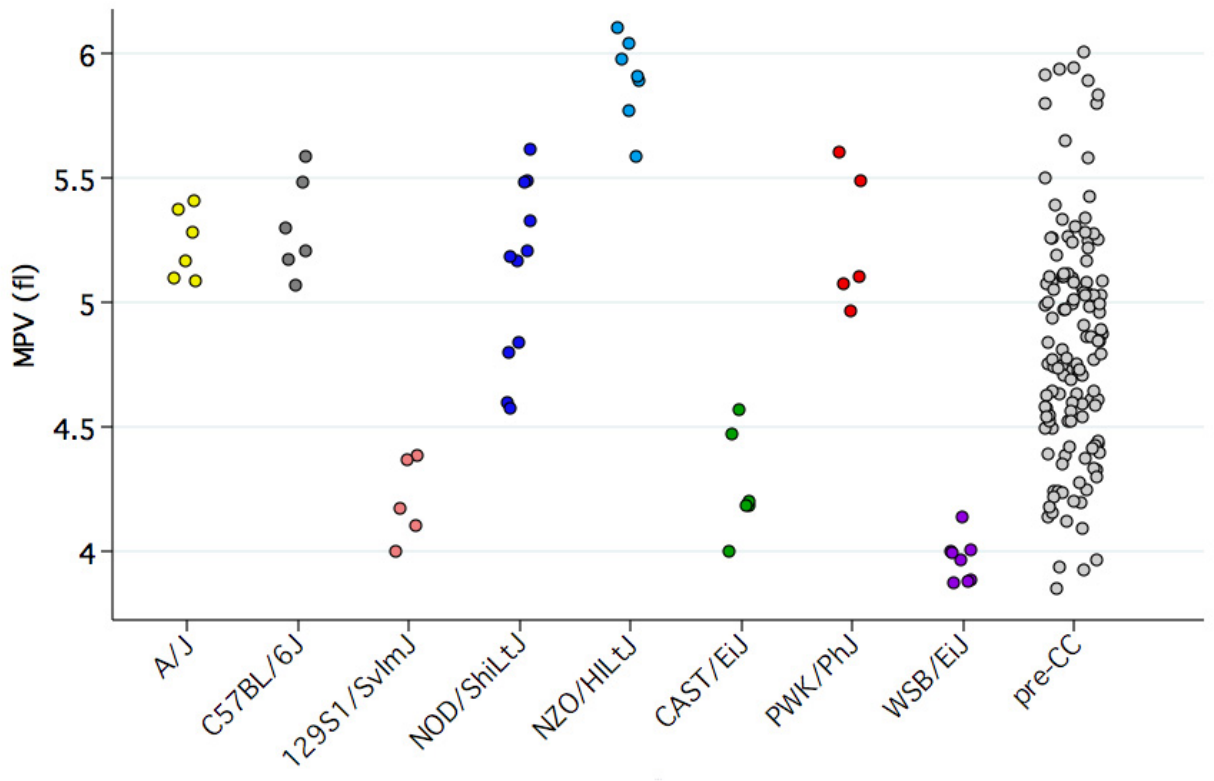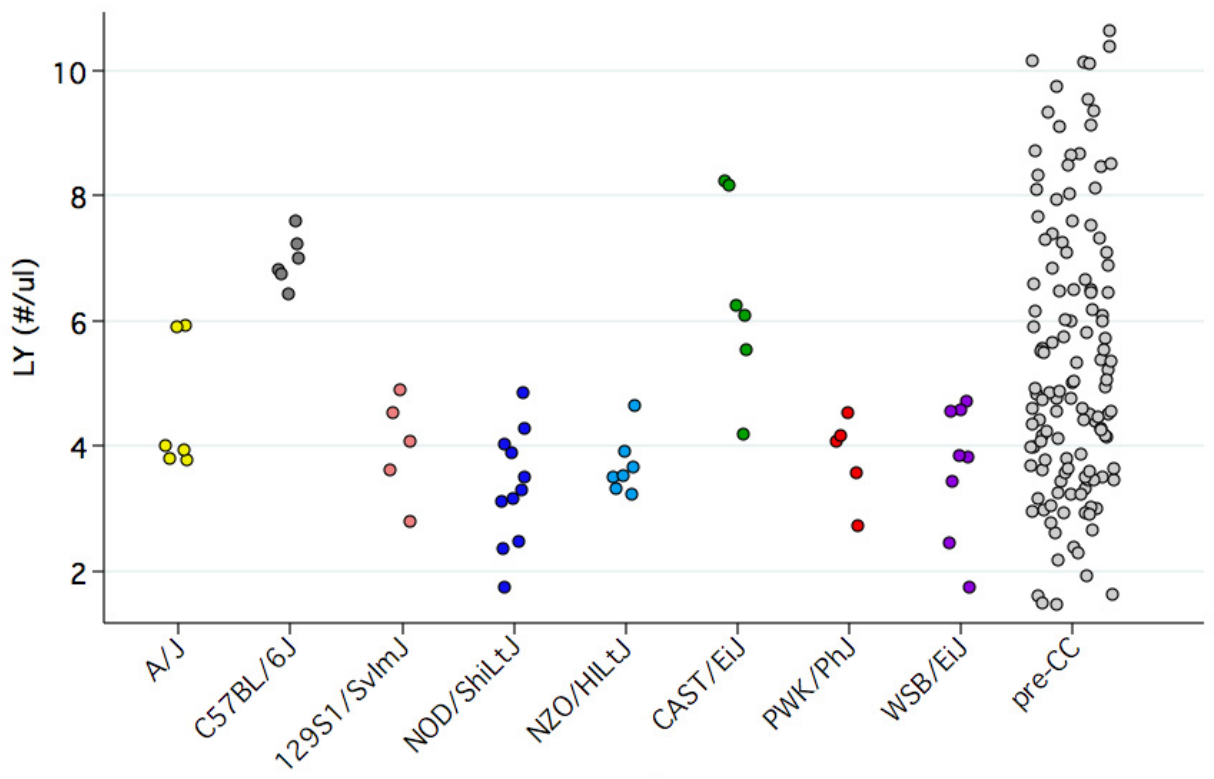

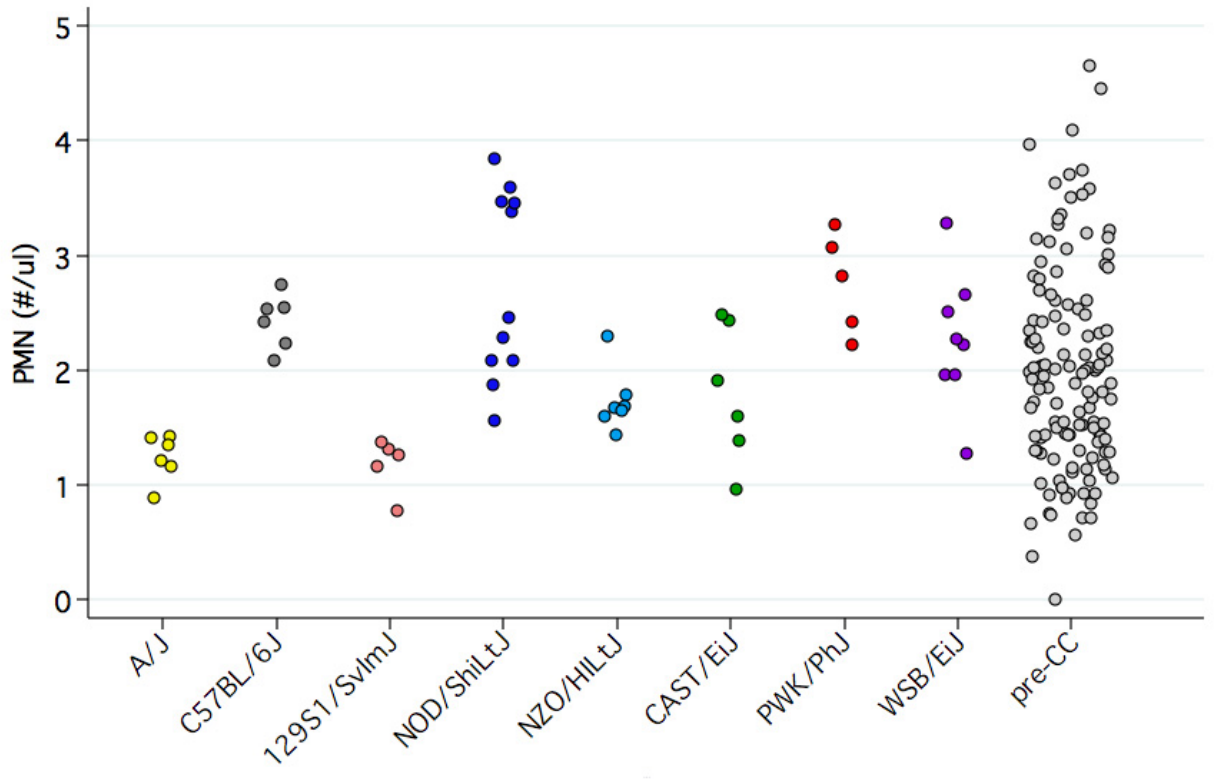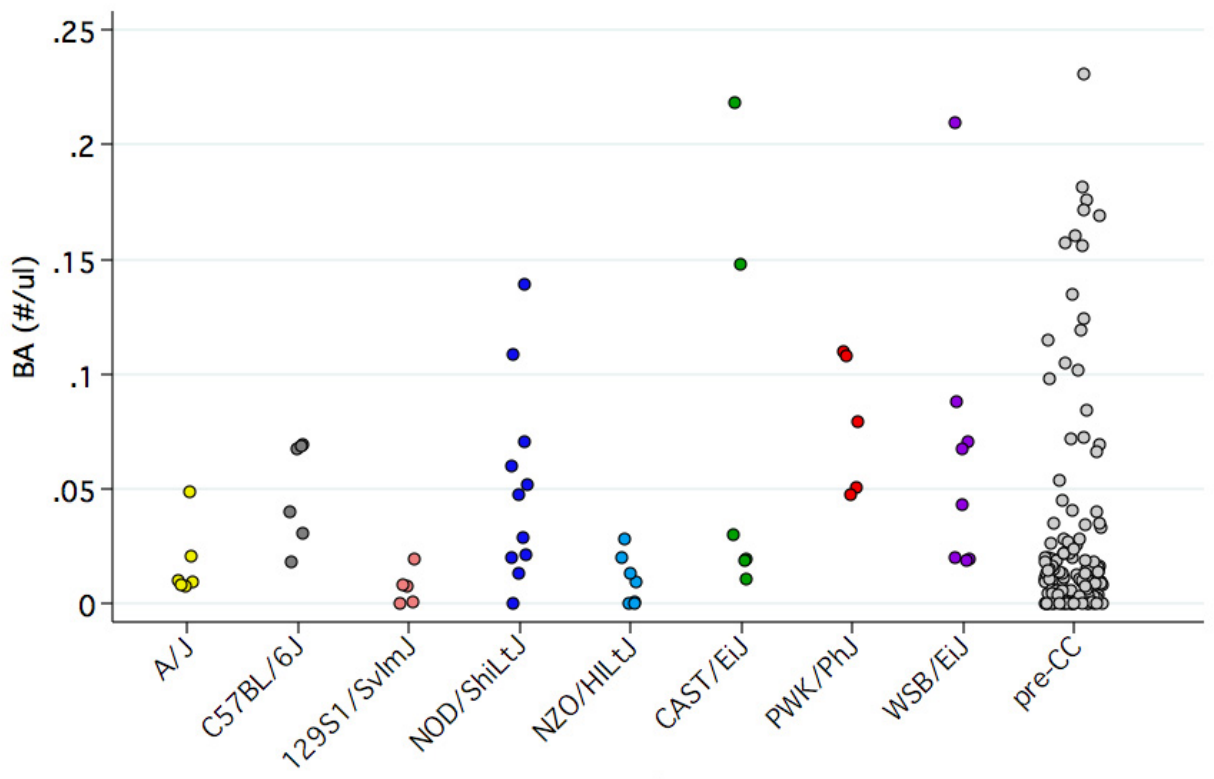

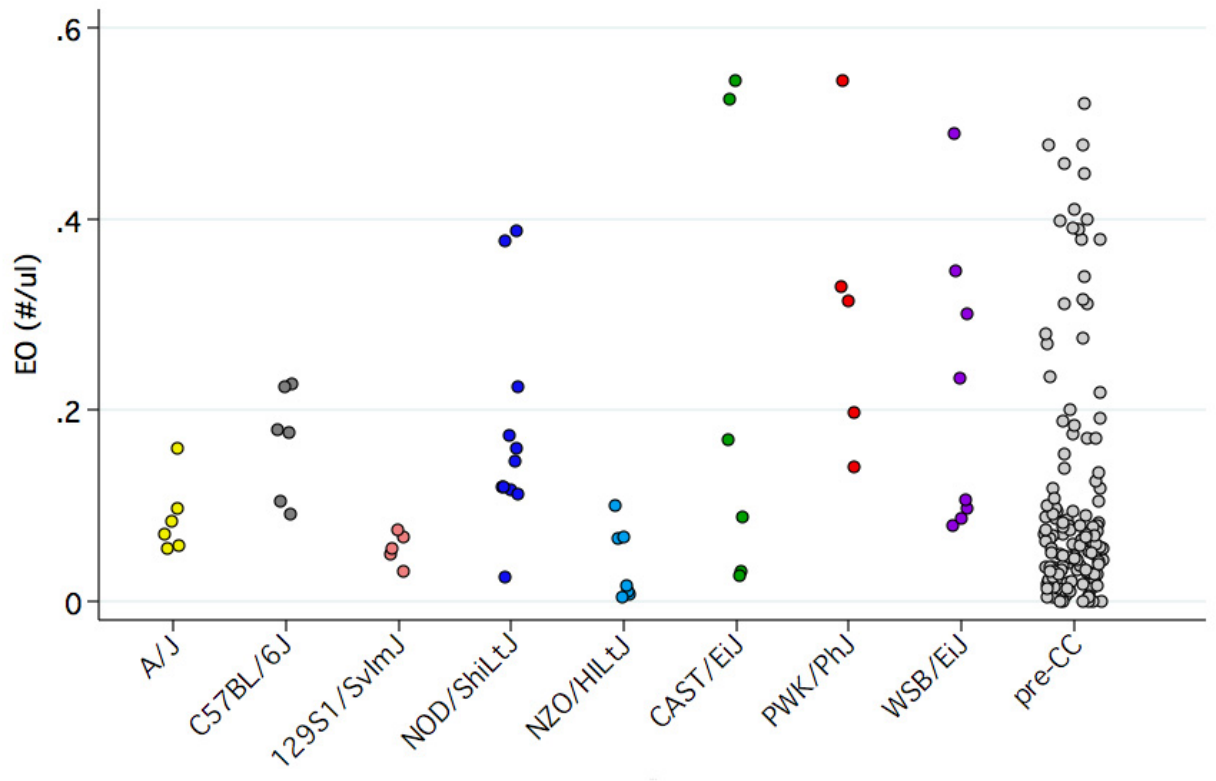

**Figure S1** Distributions of hematological traits in pre-CC mice and founder lines for which no QTL were detected.

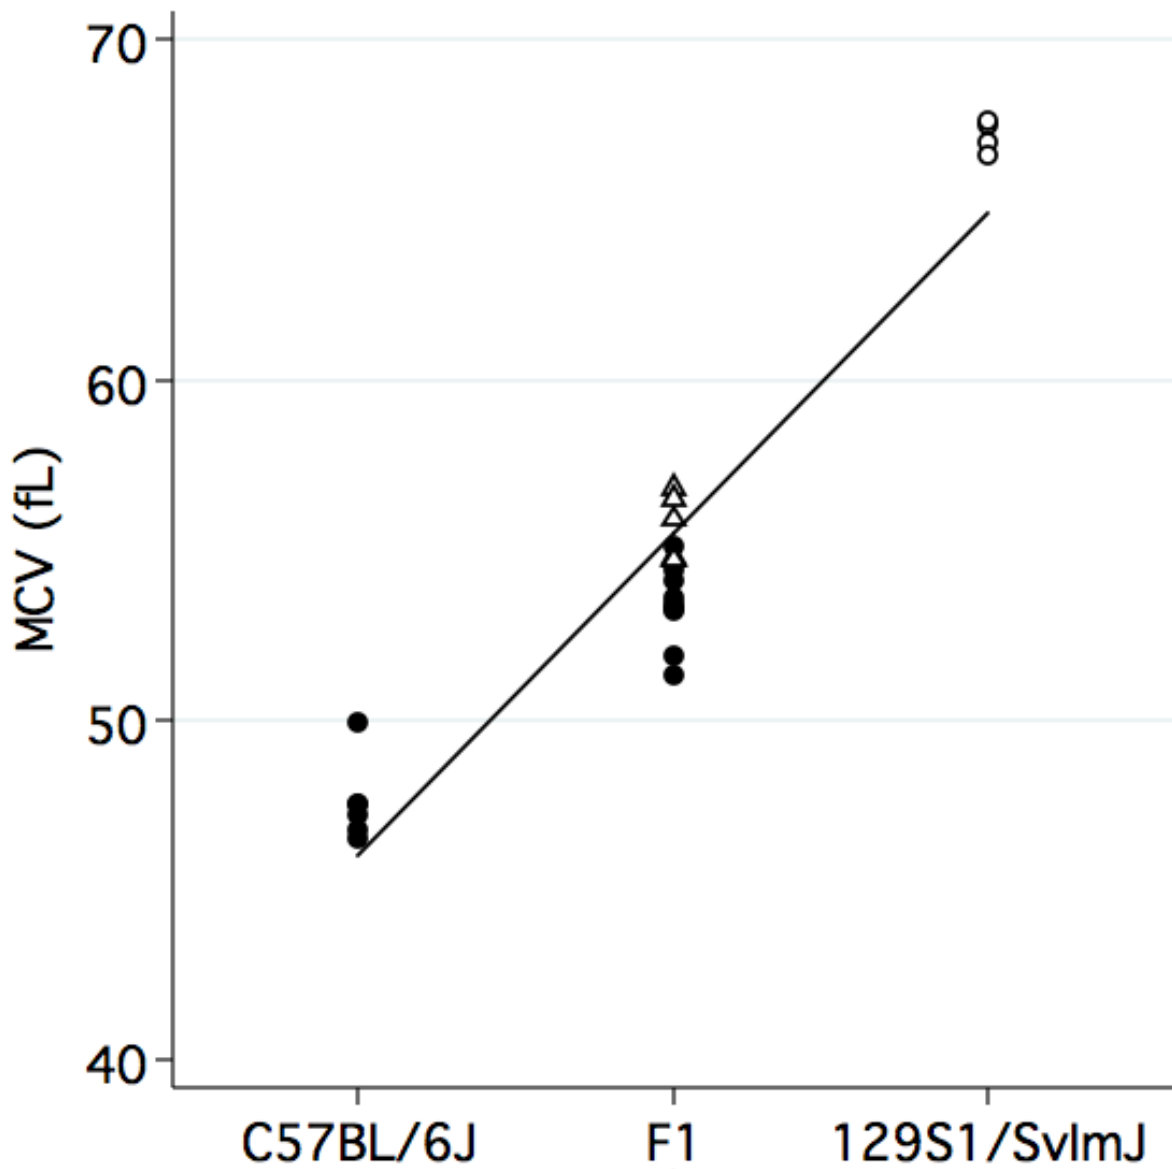

**Figure S2** MCV values among C57BL/6J (*Hbb s/s* genotype), 129S1/SvImJ (*Hbb d/d* genotype), and F1 mice (*s/d* genotype). F1 mice from 129S1/SvImJ dams are depicted as white triangles and F1 mice from C57BL/6J dams are depicted as black circles. F1 mice from 129S1/SvImJ dams had larger MCV than F1 mice from the reciprocal cross ( $55.6 \pm 0.4$  vs  $53.4 \pm 0.4$  fL,  $p = 0.002$ ).

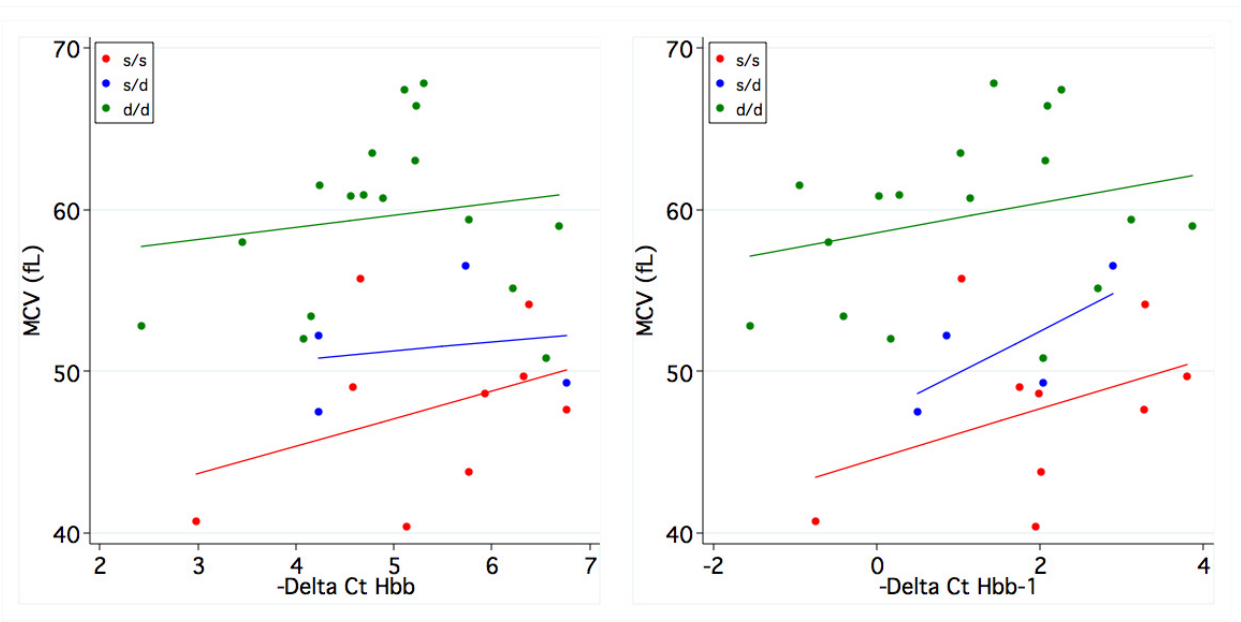

**Figure S3** *Hbb* gene expression and MCV in pre-CC mice. Total *Hbb*- $\beta$  (left) and *Hbb-b1* (right) gene expression were measured by qRT-PCR using spleen RNA from 30 pre-CC mice. Parameters for regression lines are shown in Table S9.

**Tables S1 – S3**

Tables S1-S3 are available for download at <http://www.g3journal.org/lookup/suppl/doi:10.1534/g3.111.001776/-/DC1>.



**Table S4 RBC and WBC Parameters in Collaborative Cross Founder Strain and pre-CC Mice**

| Strain                                      | RBC<br>(#/uL)   | Hb<br>(g/dL)    | MCV<br>(fL)     | RDW<br>(%)      | PLT <sup>1</sup><br>(#/uL) | MPV<br>(fL)     | WBC <sup>1</sup><br>(#/uL) | LY <sup>1</sup><br>(#/uL) | NE <sup>1</sup><br>(#/uL) | MO <sup>1</sup><br>(#/uL) |
|---------------------------------------------|-----------------|-----------------|-----------------|-----------------|----------------------------|-----------------|----------------------------|---------------------------|---------------------------|---------------------------|
| <b>A/J</b>                                  | 9.70<br>(0.13)  | 13.83<br>(0.21) | 48.62<br>(0.22) | 19.47<br>(0.14) | 1016.17<br>(10.64)         | 5.25<br>(0.06)  | 6.34<br>(0.48)             | 4.61<br>(0.43)            | 1.27<br>(0.07)            | 0.35<br>(0.03)            |
| <b>C57BL/6J</b>                             | 10.48<br>(0.25) | 15.50<br>(0.38) | 45.97<br>(0.16) | 18.38<br>(0.16) | 946.50<br>(87.17)          | 5.32<br>(0.08v) | 10.74<br>(0.26)            | 7.03<br>(0.16)            | 2.46<br>(0.09)            | 1.03<br>(0.06v)           |
| <b>129S1/SvImJ</b>                          | 9.25<br>(0.74)  | 13.47<br>(1.17) | 62.42<br>(0.38) | 17.00<br>(0.25) | 449.17<br>(29.98)          | 4.25<br>(0.07)  | 5.16<br>(0.64)             | 3.72<br>(0.45)            | 1.11<br>(0.14)            | 0.28<br>(0.05)            |
| <b>NOD/ShiLtJ</b>                           | 9.44<br>(0.27)  | 15.43<br>(0.46) | 55.90<br>(0.61) | 17.14<br>(0.14) | 896.50<br>(50.82)          | 5.18<br>(0.11)  | 7.11<br>(0.59)             | 3.52<br>(0.30)            | 2.86<br>(0.25)            | 0.49<br>(0.04)            |
| <b>NZO/HILtJ</b>                            | 10.54<br>(0.35) | 14.93<br>(0.54) | 44.52<br>(0.30) | 20.41<br>(0.82) | 1443.50<br>(35.41)         | 5.88<br>(0.07)  | 5.90<br>(0.27)             | 3.76<br>(0.20)            | 1.65<br>(0.07)            | 0.48<br>(0.06)            |
| <b>CAST/EiJ</b>                             | 12.18<br>(0.22) | 16.52<br>(0.33) | 46.32<br>(0.18) | 20.05<br>(0.44) | 659.33<br>(50.81)          | 4.28<br>(0.09)  | 9.04<br>(0.92)             | 6.47<br>(0.64)            | 1.83<br>(0.25)            | 0.44<br>(0.08)            |
| <b>PWK/PhJ</b>                              | 12.93<br>(0.48) | 18.54<br>(0.82) | 60.84<br>(0.67) | 18.56<br>(0.25) | 689.00<br>(141.28)         | 5.26<br>(0.12)  | 8.03<br>(0.59)             | 3.87<br>(0.33)            | 2.79<br>(0.20)            | 0.98<br>(0.09)            |
| <b>WSB/EiJ</b>                              | 12.47<br>(0.52) | 17.15<br>(0.68) | 57.84<br>(0.30) | 16.51<br>(0.48) | 736.13<br>(30.40)          | 3.98<br>(0.03)  | 7.06<br>(0.61)             | 3.67<br>(0.37)            | 2.28<br>(0.21)            | 0.82<br>(0.08)            |
| <b>Pre-CC</b>                               | 10.12<br>(0.14) | 14.49<br>(0.18) | 54.35<br>(0.61) | 18.15<br>(0.13) | 997.78<br>(34.80)          | 4.80<br>(0.04)  | 8.00<br>(0.26)             | 5.27<br>(0.19)            | 2.03<br>(0.08)            | 0.56<br>(0.02)            |
| <b>F-statistic<sup>2</sup></b>              | 10.89<br>4.49E  | 5.11<br>2.29E   | 260.51<br>2.29E | 13.37<br>2.88E  | 14.92<br>4.56E             | 58.24<br>5.11E- | 6.46<br>2.38E              | 8.91<br>6.14E             | 11.83<br>1.42E            | 13.55<br>1.96E            |
| <b>p-value</b>                              | -08             | -04             | -35             | -09             | -10                        | 21              | -05                        | -07                       | -08                       | -09                       |
| <b>Broad sense heritability<sup>3</sup></b> |                 |                 |                 |                 |                            |                 |                            |                           |                           |                           |
| <b>r<sub>1</sub></b>                        | 0.62            | 0.41            | 0.98            | 0.67            | 0.70                       | 0.91            | 0.48                       | 0.57                      | 0.64                      | 0.68                      |
| <b>g<sup>2</sup></b>                        | 0.45            | 0.25            | 0.96            | 0.51            | 0.54                       | 0.83            | 0.31                       | 0.40                      | 0.47                      | 0.51                      |

Values are reported as mean (standard error).

<sup>1</sup> data were log-transformed for statistical analysis and mapping.

<sup>2</sup> ANOVA conducted using only founder strains.

<sup>3</sup>  $r_1$ , the interclass correlation, and  $g^2$ , coefficient of genetic determination, were calculated using founder strains only, as described in (Xing et al., 2009).

**Table S5 SNPs in the Hemoglobin  $\beta$  Locus that Distinguish Single vs. Diffuse Strains**

| <b>Hbb-b1</b> |                            |           |           |           |           |           |           |           |            |            |                   |
|---------------|----------------------------|-----------|-----------|-----------|-----------|-----------|-----------|-----------|------------|------------|-------------------|
| <b>Strain</b> | <b>Amino Acid Position</b> |           |           |           |           |           |           |           |            |            | <b>Phenotype*</b> |
|               | <b>9</b>                   | <b>13</b> | <b>16</b> | <b>20</b> | <b>58</b> | <b>76</b> | <b>77</b> | <b>80</b> | <b>109</b> | <b>139</b> |                   |
| C57BL/6J      | A                          | G         | G         | A         | A         | N         | H         | S         | M          | A          | Single            |
| NOD/ShiLtJ    | -                          | -         | -         | -         | -         | -         | -         | -         | -          | -          | Single            |
| NZO/HiLtJ     | -                          | -         | -         | -         | -         | -         | -         | -         | -          | -          | Single            |
| 129S1/SvImJ   | S                          | <b>C</b>  | A         | P         | -         | -         | -         | -         | -          | <b>T</b>   | Diffuse           |
| A/J           | S                          | <b>C</b>  | A         | P         | -         | -         | -         | -         | V          | <b>T</b>   | Diffuse           |
| WSB/EiJ       | S                          | <b>C</b>  | A         | S         | P         | -         | -         | -         | V          | <b>T</b>   | Diffuse           |
| PWK/PhJ       | S                          | <b>C</b>  | A         | P         | -         | K         | N         | -         | V          | <b>T</b>   | Diffuse           |
| CAST/EiJ      | S                          | <b>C</b>  | -         | -         | -         | K         | N         | N         | V          | <b>T</b>   | Diffuse           |

  

| <b>Hbb-b2</b> |                            |           |           |           |           |           |           |           |            |            |                   |
|---------------|----------------------------|-----------|-----------|-----------|-----------|-----------|-----------|-----------|------------|------------|-------------------|
| <b>Strain</b> | <b>Amino Acid Position</b> |           |           |           |           |           |           |           |            |            | <b>Phenotype*</b> |
|               | <b>9</b>                   | <b>13</b> | <b>16</b> | <b>20</b> | <b>58</b> | <b>76</b> | <b>77</b> | <b>80</b> | <b>109</b> | <b>139</b> |                   |
| C57BL/6J      | -                          | -         | -         | -         | -         | -         | -         | -         | -          | -          | Single            |
| NOD/ShiLtJ    | -                          | -         | -         | -         | -         | -         | -         | -         | -          | -          | Single            |
| NZO/HiLtJ     | -                          | -         | -         | -         | -         | -         | -         | -         | -          | -          | Single            |
| 129S1/SvImJ   | -                          | <b>C</b>  | -         | S         | -         | -         | -         | -         | -          | <b>T</b>   | Diffuse           |
| A/J           | -                          | <b>C</b>  | -         | S         | -         | -         | -         | -         | -          | <b>T</b>   | Diffuse           |
| WSB/EiJ       | -                          | <b>C</b>  | -         | S         | -         | -         | -         | -         | -          | <b>T</b>   | Diffuse           |
| PWK/PhJ       | -                          | <b>C</b>  | -         | S         | -         | -         | -         | -         | -          | <b>T</b>   | Diffuse           |
| CAST/EiJ      | -                          | <b>C</b>  | -         | -         | -         | -         | -         | -         | -          | <b>T</b>   | Diffuse           |

\* Phenotype refers to the band pattern of hemoglobin  $\beta$  protein on isoelectric focusing experiments. Data from literature and databases was compiled to assemble this table.

Table S6 MCV (fL) Among Pre-CC mice and Founder Strains as a Function of *Hbb-b1/b2* Single versus *Diffuse* Genotypes

| Founder Allele           | n  | Founder |       | p-value                    |
|--------------------------|----|---------|-------|----------------------------|
|                          |    | Pre-CC  | Mice* |                            |
| C57BL/6J (s/s)           | 15 | 46.95   | 45.97 | 0.60                       |
| NOD/ShiLtJ (s/s)         | 10 | 47.23   | 55.90 | <b>2.0x10<sup>-5</sup></b> |
| NZO/HILtJ (s/s)          | 9  | 47.71   | 44.52 | 0.28                       |
| A/J (d/d)                | 12 | 58.68   | 48.62 | <b>8.0x10<sup>-4</sup></b> |
| 129S1/SvImJ (d/d)        | 7  | 58.30   | 62.42 | 0.15                       |
| CAST/EiJ (d/d)           | 9  | 56.82   | 46.32 | <b>1.7x10<sup>-4</sup></b> |
| PWK/PhJ (d/d)            | 9  | 61.53   | 60.84 | 0.58                       |
| WSB/EiJ (d/d)            | 14 | 60.77   | 57.84 | 0.05                       |
| <b>Genotype Averages</b> |    |         |       |                            |
| s/s                      | 40 | 48.15   | 55.93 |                            |
| d/d                      | 69 | 59.45   | 50.46 |                            |

\* Data for founder mice is from Table S1.

**Table S7 Regions of Shared Ancestry Identified Using Mouse Genomes Project SNP Data**

| QTL          | Chr | Start     | End       | Range   | Number of SNPs | Strains with region of shared ancestry | Mismatched SNPs |     | Shared SNPs |      | Uniquely Shared SNPs |      |
|--------------|-----|-----------|-----------|---------|----------------|----------------------------------------|-----------------|-----|-------------|------|----------------------|------|
|              |     |           |           |         |                |                                        | <i>n</i>        | %   | <i>n</i>    | %    | <i>n</i>             | %    |
| <i>Mcvq4</i> | 7   | 110959072 | 111086522 | 127450  | 3499           | C57BL/6J<br>NOD/HiLtJ<br>NZO/ShiLtJ    | 27              | 0.8 | 3472        | 99.2 | 1455                 | 41.6 |
| <i>Mcvq5</i> | 14  | 20453181  | 22963216  | 2510035 | 35931          | 129S1/SvlmJ NOD/HiLtJ                  | 457             | 1.3 | 35,474      | 98.7 | 619                  | 1.7  |
| <i>Moq1</i>  | 1   | 92803891  | 92970550  | 166659  | 3357           | A/J<br>WSB/EiJ                         | 76              | 2.3 | 3281        | 97.7 | 9                    | 0.3  |

**Table S8**

Table S8 is available for download as a text file at <http://www.g3journal.org/lookup/suppl/doi:10.1534/g3.111.001776/-/DC1>.

**Table S9 Regression Models of MCV as a Function of Hbb s/d Genotype and Hbb Gene Expression\***

| 1. Hbb gene expression                                           |       |         |
|------------------------------------------------------------------|-------|---------|
| Term                                                             | Beta  | p-value |
| Hbb expression                                                   | -0.02 | 0.99    |
| Intercept                                                        | 55.02 | <0.001  |
| 2. Hbb gene expression and s/d genotype                          |       |         |
| Predictor                                                        | Beta  | p-value |
| Hbb expression                                                   | 1.00  | 0.26    |
| Genotype                                                         | 6.26  | <0.001  |
| Intercept                                                        | 41.88 | <0.001  |
| 3. Hbb gene expression, s/d genotype, and genotype*expression    |       |         |
| Predictor                                                        | Beta  | p-value |
| Hbb expression                                                   | 1.62  | 0.28    |
| Genotype                                                         | 8.89  | 0.10    |
| Genotype*Expression                                              | -0.51 | 0.61    |
| Intercept                                                        | 38.56 | <0.001  |
| 4. Hbb-b1 gene expression                                        |       |         |
| Term                                                             | Beta  | p-value |
| Hbb-b1 expression                                                | 0.00  | 1.00    |
| Intercept                                                        | 54.91 | <0.001  |
| 5. Hbb-b1 and s/d genotype                                       |       |         |
|                                                                  | Beta  | p-value |
| Gene Expression                                                  | 1.20  | 0.08    |
| Genotype                                                         | 6.57  | <0.001  |
| Intercept                                                        | 44.87 | <0.001  |
| 6. Hbb-b1 gene expression, s/d genotype, and genotype*expression |       |         |
|                                                                  | Beta  | p-value |
| Hbb-b1 expression                                                | 1.79  | 0.16    |
| Genotype                                                         | 7.31  | <0.001  |
| Genotype*Expression                                              | -0.43 | 0.58    |
| Intercept                                                        | 43.69 | <0.001  |

\* Note that *Hbb* gene expression (total or Hbb-b1) is expressed as the  $\Delta Ct$  (relative to *Rps29*)  $-\Delta Ct$  as in Figure S3.
