# Supplementary material for: Genetic Analysis of Hematological Parameters in Incipient Lines of the Collaborative Cross
Source: Oxford University Press journal article supplement (doi:10.1534/g3.111.001776), 2012-02-01
Supplement: 157_figures1.pdf [file 157_figures1.pdf]

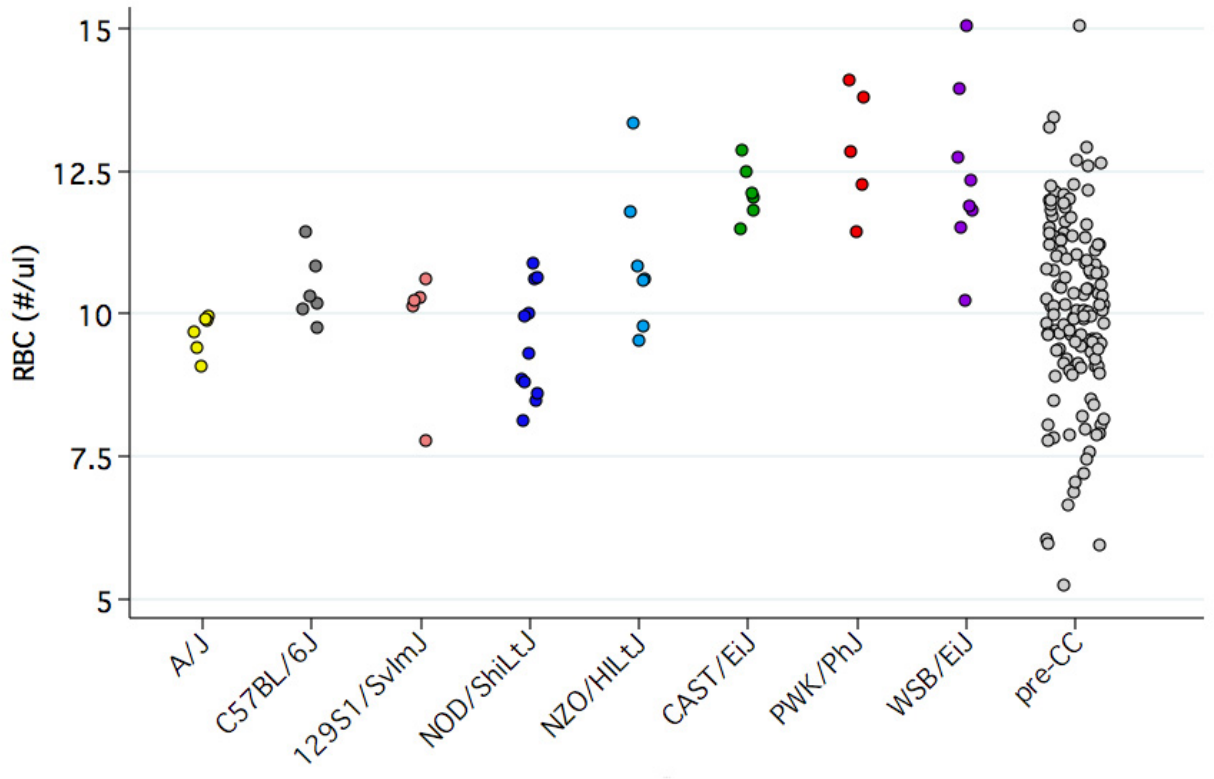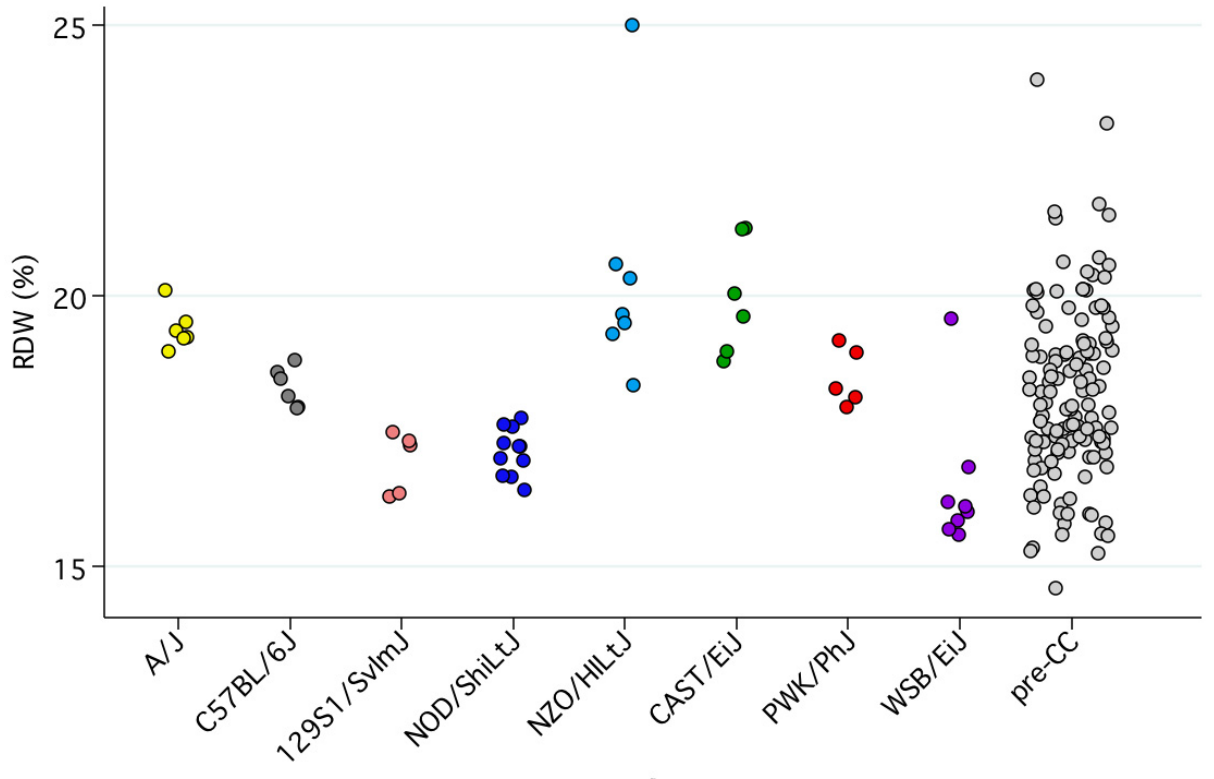

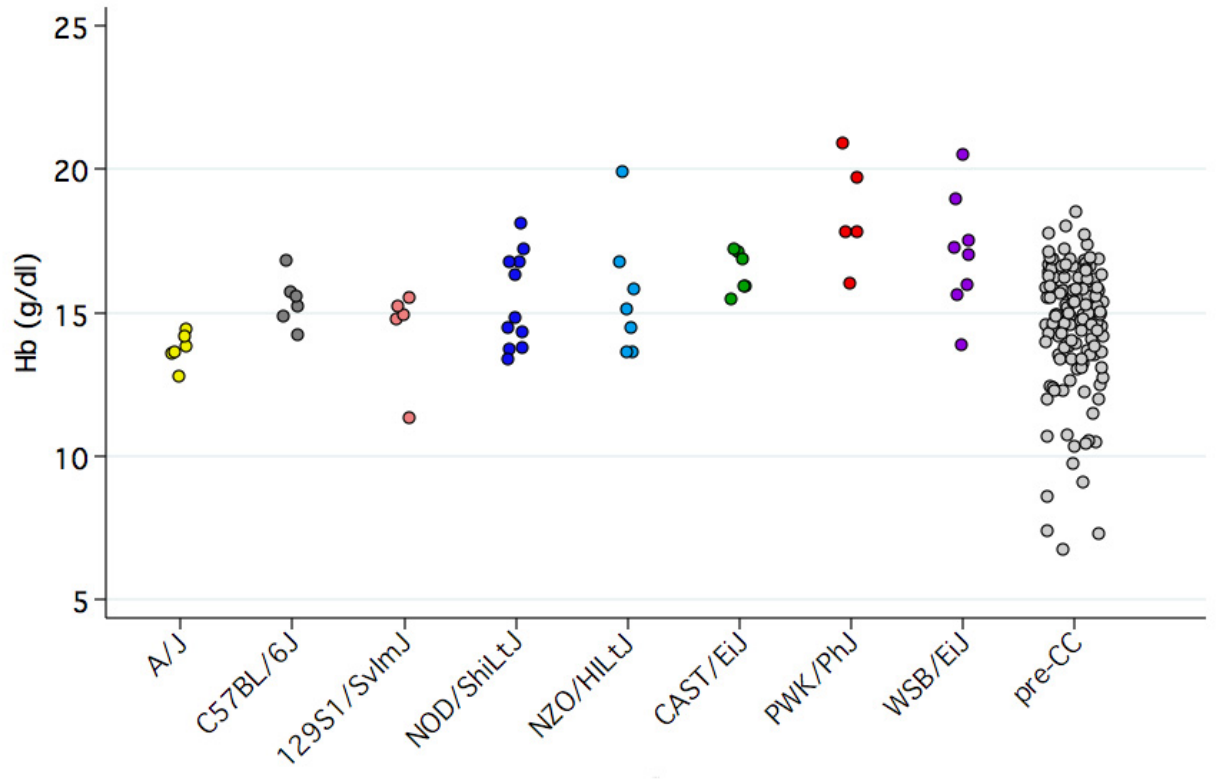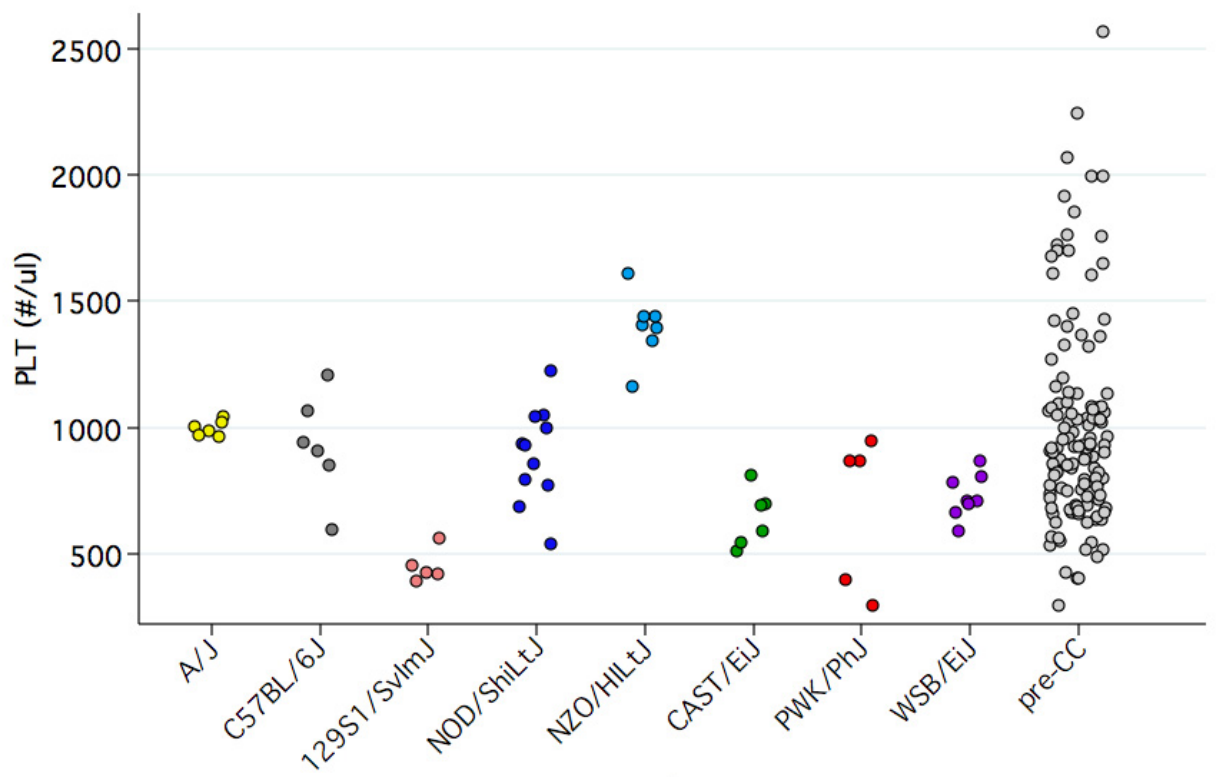

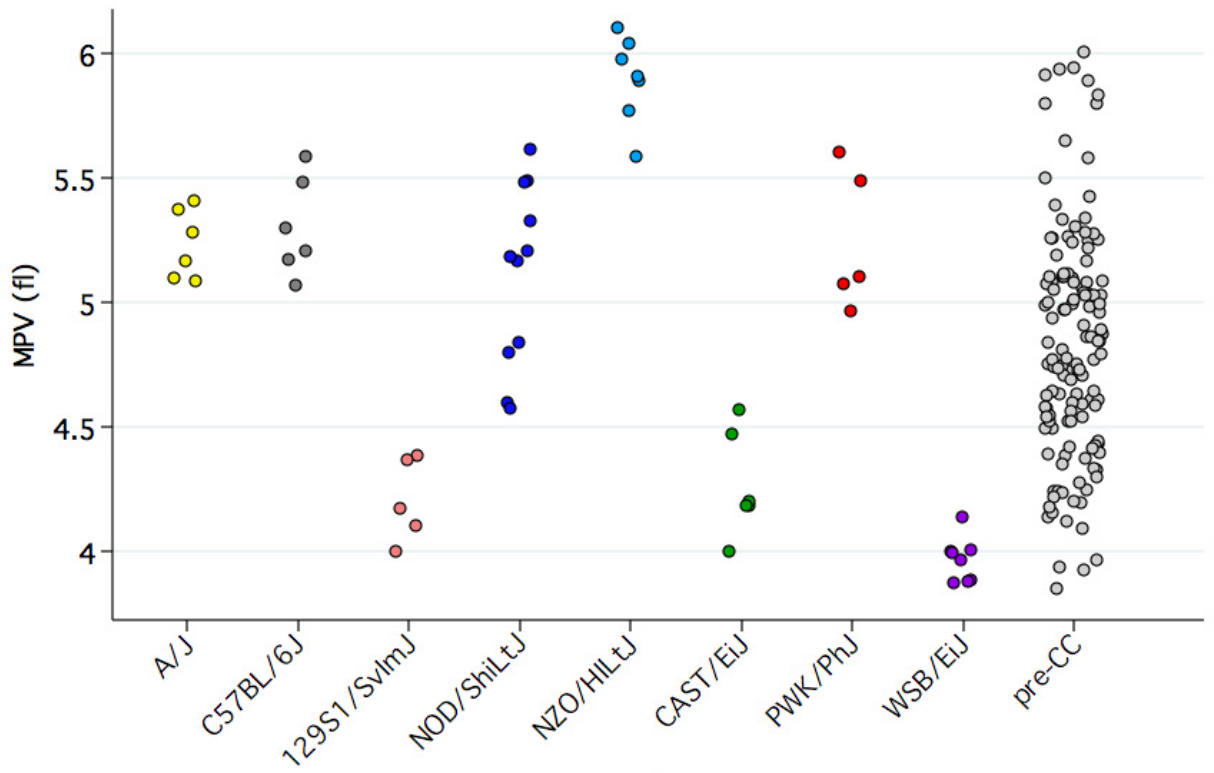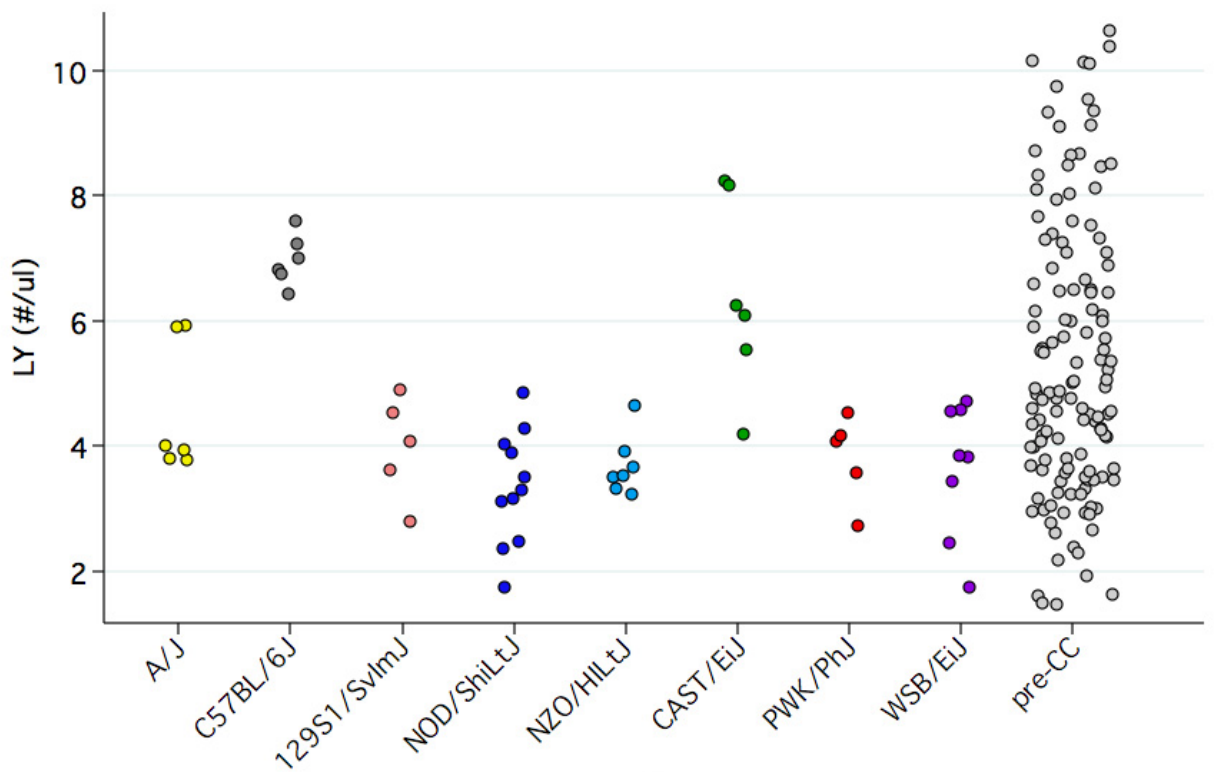

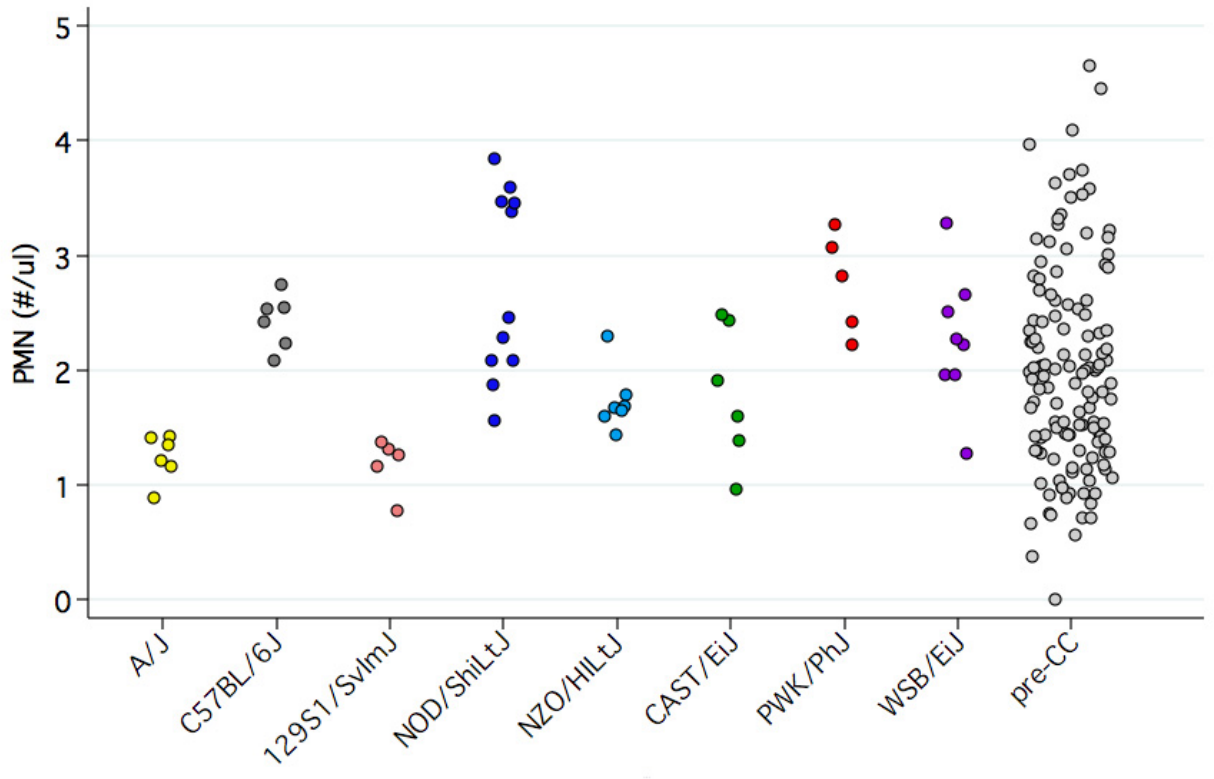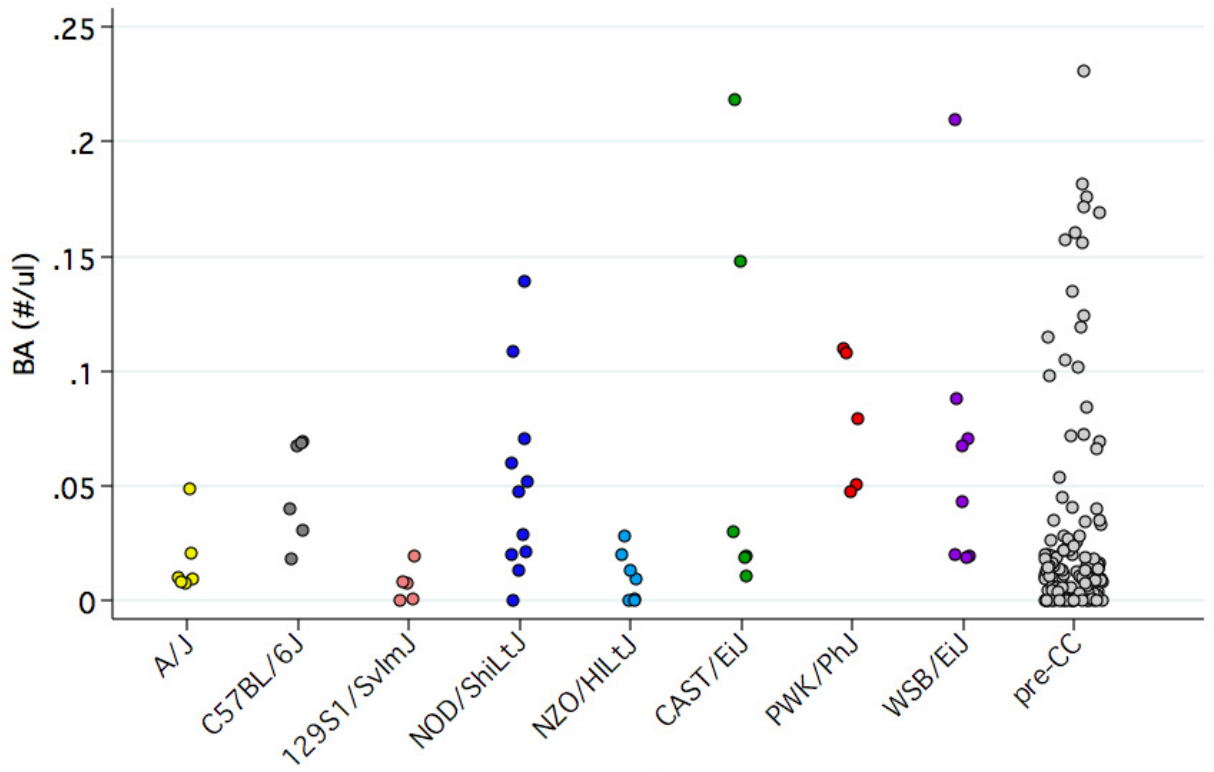

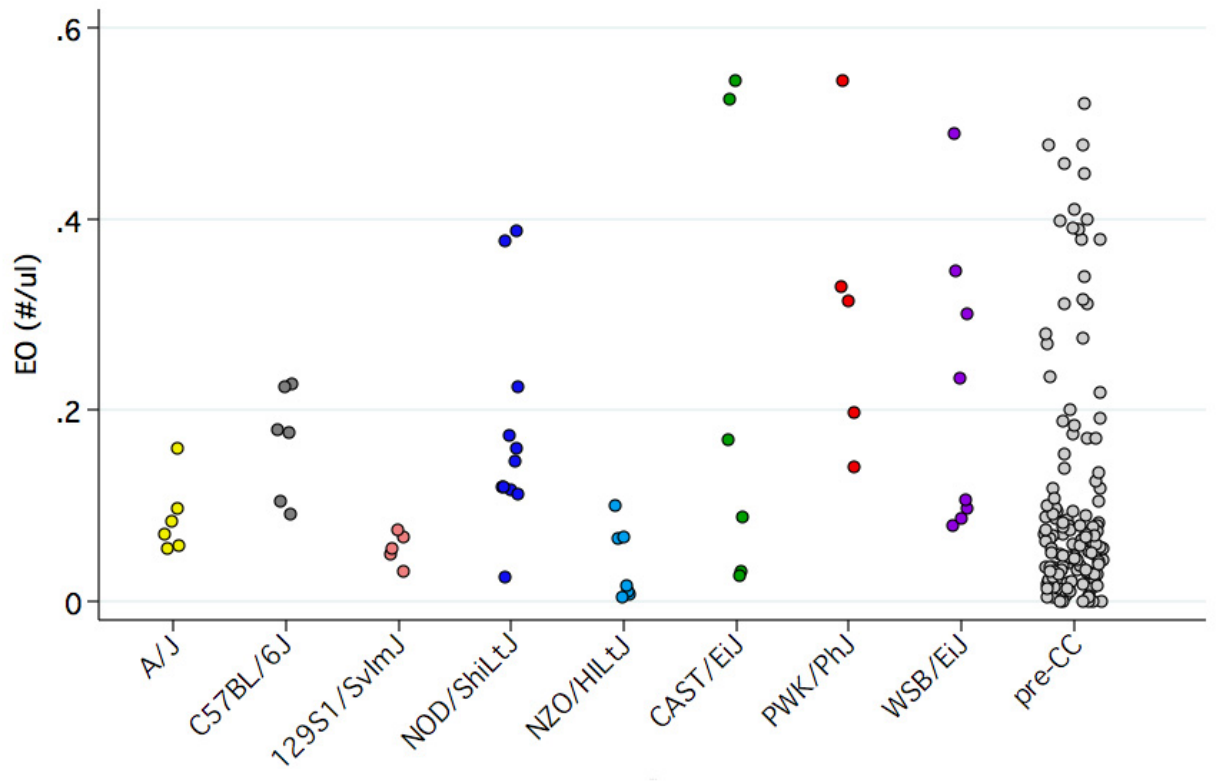

**Figure S1** Distributions of hematological traits in pre-CC mice and founder lines for which no QTL were detected.
