# Supplementary material for: Genetic Analysis of Hematological Parameters in Incipient Lines of the Collaborative Cross
Source: Oxford University Press journal article supplement (doi:10.1534/g3.111.001776), 2012-02-01
Supplement: 157_figures2.pdf [file 157_figures2.pdf]

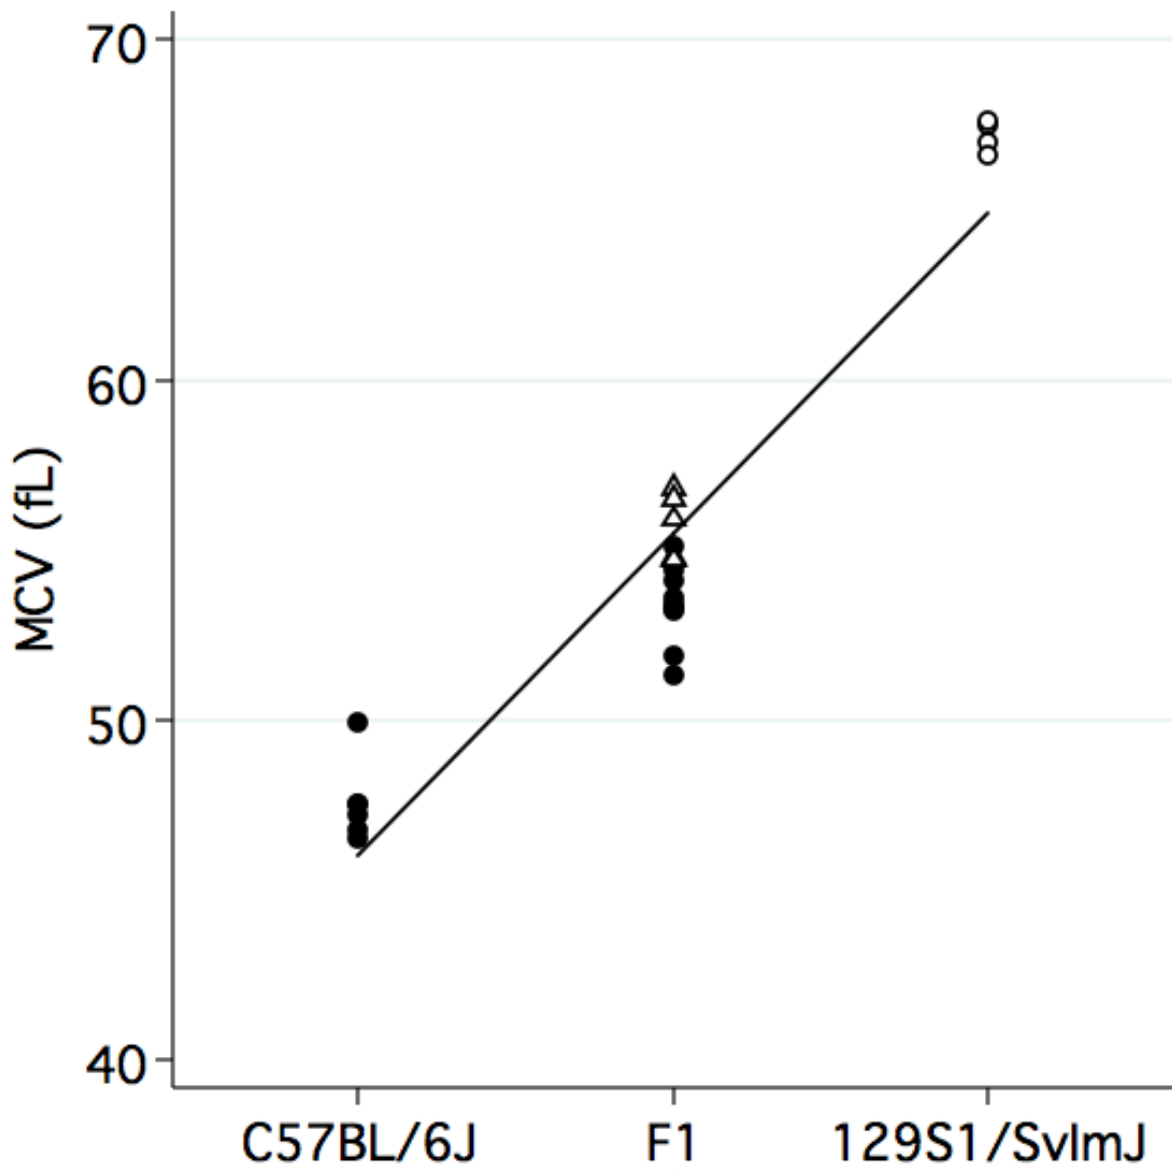

**Figure S2** MCV values among C57BL/6J (*Hbb s/s* genotype), 129S1/SvImJ (*Hbb d/d* genotype), and F1 mice (*s/d* genotype). F1 mice from 129S1/SvImJ dams are depicted as white triangles and F1 mice from C57BL/6J dams are depicted as black circles. F1 mice from 129S1/SvImJ dams had larger MCV than F1 mice from the reciprocal cross ( $55.6 \pm 0.4$  vs  $53.4 \pm 0.4$  fL,  $p = 0.002$ ).
