# Supplementary material for: Genetic Analysis of Hematological Parameters in Incipient Lines of the Collaborative Cross
Source: Oxford University Press journal article supplement (doi:10.1534/g3.111.001776), 2012-02-01
Supplement: 157_figures3.pdf [file 157_figures3.pdf]

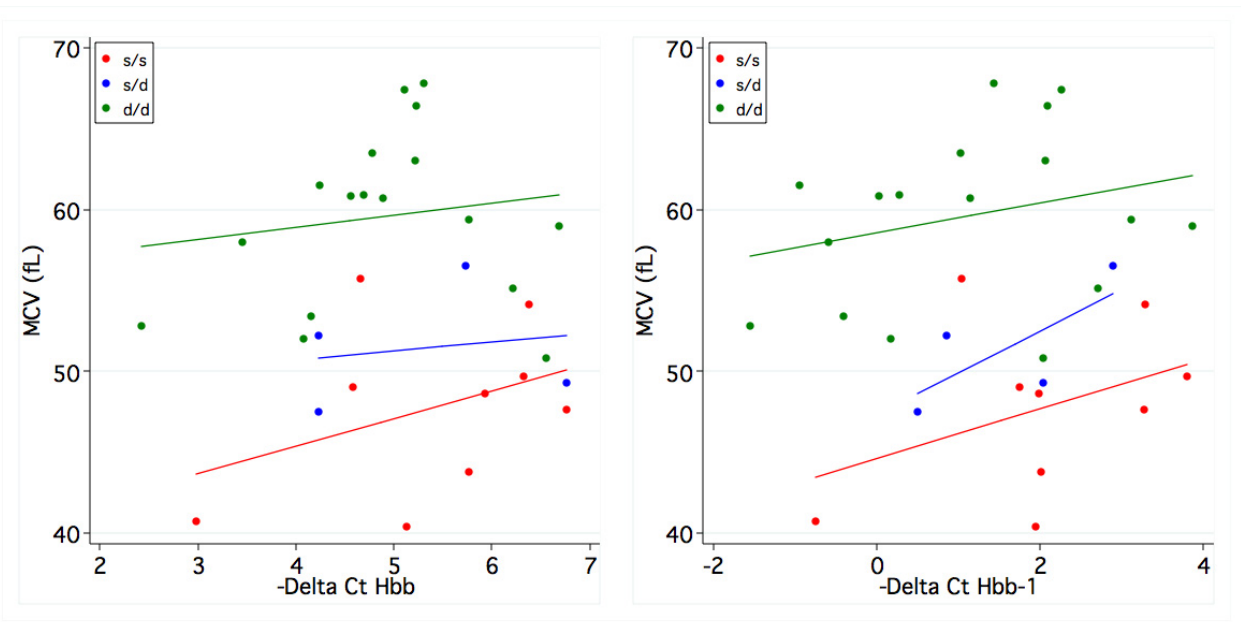

**Figure S3** *Hbb* gene expression and MCV in pre-CC mice. Total *Hbb*- $\beta$  (left) and *Hbb-b1* (right) gene expression were measured by qRT-PCR using spleen RNA from 30 pre-CC mice. Parameters for regression lines are shown in Table S9.
