# Supplementary material for: Genetic Analysis of Hematological Parameters in Incipient Lines of the Collaborative Cross
Source: Oxford University Press journal article supplement (doi:10.1534/g3.111.001776), 2012-02-01
Supplement: 157_tables4.pdf [file 157_tables4.pdf]

**Table S4 RBC and WBC Parameters in Collaborative Cross Founder Strain and pre-CC Mice**

| Strain                                      | RBC<br>(#/uL)   | Hb<br>(g/dL)    | MCV<br>(fL)     | RDW<br>(%)      | PLT <sup>1</sup><br>(#/uL) | MPV<br>(fL)     | WBC <sup>1</sup><br>(#/uL) | LY <sup>1</sup><br>(#/uL) | NE <sup>1</sup><br>(#/uL) | MO <sup>1</sup><br>(#/uL) |
|---------------------------------------------|-----------------|-----------------|-----------------|-----------------|----------------------------|-----------------|----------------------------|---------------------------|---------------------------|---------------------------|
| <b>A/J</b>                                  | 9.70<br>(0.13)  | 13.83<br>(0.21) | 48.62<br>(0.22) | 19.47<br>(0.14) | 1016.17<br>(10.64)         | 5.25<br>(0.06)  | 6.34<br>(0.48)             | 4.61<br>(0.43)            | 1.27<br>(0.07)            | 0.35<br>(0.03)            |
| <b>C57BL/6J</b>                             | 10.48<br>(0.25) | 15.50<br>(0.38) | 45.97<br>(0.16) | 18.38<br>(0.16) | 946.50<br>(87.17)          | 5.32<br>(0.08v) | 10.74<br>(0.26)            | 7.03<br>(0.16)            | 2.46<br>(0.09)            | 1.03<br>(0.06v)           |
| <b>129S1/SvImJ</b>                          | 9.25<br>(0.74)  | 13.47<br>(1.17) | 62.42<br>(0.38) | 17.00<br>(0.25) | 449.17<br>(29.98)          | 4.25<br>(0.07)  | 5.16<br>(0.64)             | 3.72<br>(0.45)            | 1.11<br>(0.14)            | 0.28<br>(0.05)            |
| <b>NOD/ShiLtJ</b>                           | 9.44<br>(0.27)  | 15.43<br>(0.46) | 55.90<br>(0.61) | 17.14<br>(0.14) | 896.50<br>(50.82)          | 5.18<br>(0.11)  | 7.11<br>(0.59)             | 3.52<br>(0.30)            | 2.86<br>(0.25)            | 0.49<br>(0.04)            |
| <b>NZO/HILtJ</b>                            | 10.54<br>(0.35) | 14.93<br>(0.54) | 44.52<br>(0.30) | 20.41<br>(0.82) | 1443.50<br>(35.41)         | 5.88<br>(0.07)  | 5.90<br>(0.27)             | 3.76<br>(0.20)            | 1.65<br>(0.07)            | 0.48<br>(0.06)            |
| <b>CAST/EiJ</b>                             | 12.18<br>(0.22) | 16.52<br>(0.33) | 46.32<br>(0.18) | 20.05<br>(0.44) | 659.33<br>(50.81)          | 4.28<br>(0.09)  | 9.04<br>(0.92)             | 6.47<br>(0.64)            | 1.83<br>(0.25)            | 0.44<br>(0.08)            |
| <b>PWK/PhJ</b>                              | 12.93<br>(0.48) | 18.54<br>(0.82) | 60.84<br>(0.67) | 18.56<br>(0.25) | 689.00<br>(141.28)         | 5.26<br>(0.12)  | 8.03<br>(0.59)             | 3.87<br>(0.33)            | 2.79<br>(0.20)            | 0.98<br>(0.09)            |
| <b>WSB/EiJ</b>                              | 12.47<br>(0.52) | 17.15<br>(0.68) | 57.84<br>(0.30) | 16.51<br>(0.48) | 736.13<br>(30.40)          | 3.98<br>(0.03)  | 7.06<br>(0.61)             | 3.67<br>(0.37)            | 2.28<br>(0.21)            | 0.82<br>(0.08)            |
| <b>Pre-CC</b>                               | 10.12<br>(0.14) | 14.49<br>(0.18) | 54.35<br>(0.61) | 18.15<br>(0.13) | 997.78<br>(34.80)          | 4.80<br>(0.04)  | 8.00<br>(0.26)             | 5.27<br>(0.19)            | 2.03<br>(0.08)            | 0.56<br>(0.02)            |
| <b>F-statistic<sup>2</sup></b>              | 10.89<br>4.49E  | 5.11<br>2.29E   | 260.51<br>2.29E | 13.37<br>2.88E  | 14.92<br>4.56E             | 58.24<br>5.11E- | 6.46<br>2.38E              | 8.91<br>6.14E             | 11.83<br>1.42E            | 13.55<br>1.96E            |
| <b>p-value</b>                              | -08             | -04             | -35             | -09             | -10                        | 21              | -05                        | -07                       | -08                       | -09                       |
| <b>Broad sense heritability<sup>3</sup></b> |                 |                 |                 |                 |                            |                 |                            |                           |                           |                           |
| <b>r<sub>1</sub></b>                        | 0.62            | 0.41            | 0.98            | 0.67            | 0.70                       | 0.91            | 0.48                       | 0.57                      | 0.64                      | 0.68                      |
| <b>g<sup>2</sup></b>                        | 0.45            | 0.25            | 0.96            | 0.51            | 0.54                       | 0.83            | 0.31                       | 0.40                      | 0.47                      | 0.51                      |

Values are reported as mean (standard error).

<sup>1</sup> data were log-transformed for statistical analysis and mapping.

<sup>2</sup> ANOVA conducted using only founder strains.

<sup>3</sup>  $r_1$ , the interclass correlation, and  $g^2$ , coefficient of genetic determination, were calculated using founder strains only, as described in (Xing et al., 2009).
