# Supplementary material for: Genetic Analysis of Hematological Parameters in Incipient Lines of the Collaborative Cross
Source: Oxford University Press journal article supplement (doi:10.1534/g3.111.001776), 2012-02-01
Supplement: 157_tables5.pdf [file 157_tables5.pdf]

**Table S5 SNPs in the Hemoglobin  $\beta$  Locus that Distinguish Single vs. Diffuse Strains**

| <b>Hbb-b1</b> |                            |           |           |           |           |           |           |           |            |            |                   |
|---------------|----------------------------|-----------|-----------|-----------|-----------|-----------|-----------|-----------|------------|------------|-------------------|
| <b>Strain</b> | <b>Amino Acid Position</b> |           |           |           |           |           |           |           |            |            | <b>Phenotype*</b> |
|               | <b>9</b>                   | <b>13</b> | <b>16</b> | <b>20</b> | <b>58</b> | <b>76</b> | <b>77</b> | <b>80</b> | <b>109</b> | <b>139</b> |                   |
| C57BL/6J      | A                          | G         | G         | A         | A         | N         | H         | S         | M          | A          | Single            |
| NOD/ShiLtJ    | -                          | -         | -         | -         | -         | -         | -         | -         | -          | -          | Single            |
| NZO/HiLtJ     | -                          | -         | -         | -         | -         | -         | -         | -         | -          | -          | Single            |
| 129S1/SvImJ   | S                          | <b>C</b>  | A         | P         | -         | -         | -         | -         | -          | <b>T</b>   | Diffuse           |
| A/J           | S                          | <b>C</b>  | A         | P         | -         | -         | -         | -         | V          | <b>T</b>   | Diffuse           |
| WSB/EiJ       | S                          | <b>C</b>  | A         | S         | P         | -         | -         | -         | V          | <b>T</b>   | Diffuse           |
| PWK/PhJ       | S                          | <b>C</b>  | A         | P         | -         | K         | N         | -         | V          | <b>T</b>   | Diffuse           |
| CAST/EiJ      | S                          | <b>C</b>  | -         | -         | -         | K         | N         | N         | V          | <b>T</b>   | Diffuse           |

  

| <b>Hbb-b2</b> |                            |           |           |           |           |           |           |           |            |            |                   |
|---------------|----------------------------|-----------|-----------|-----------|-----------|-----------|-----------|-----------|------------|------------|-------------------|
| <b>Strain</b> | <b>Amino Acid Position</b> |           |           |           |           |           |           |           |            |            | <b>Phenotype*</b> |
|               | <b>9</b>                   | <b>13</b> | <b>16</b> | <b>20</b> | <b>58</b> | <b>76</b> | <b>77</b> | <b>80</b> | <b>109</b> | <b>139</b> |                   |
| C57BL/6J      | -                          | -         | -         | -         | -         | -         | -         | -         | -          | -          | Single            |
| NOD/ShiLtJ    | -                          | -         | -         | -         | -         | -         | -         | -         | -          | -          | Single            |
| NZO/HiLtJ     | -                          | -         | -         | -         | -         | -         | -         | -         | -          | -          | Single            |
| 129S1/SvImJ   | -                          | <b>C</b>  | -         | S         | -         | -         | -         | -         | -          | <b>T</b>   | Diffuse           |
| A/J           | -                          | <b>C</b>  | -         | S         | -         | -         | -         | -         | -          | <b>T</b>   | Diffuse           |
| WSB/EiJ       | -                          | <b>C</b>  | -         | S         | -         | -         | -         | -         | -          | <b>T</b>   | Diffuse           |
| PWK/PhJ       | -                          | <b>C</b>  | -         | S         | -         | -         | -         | -         | -          | <b>T</b>   | Diffuse           |
| CAST/EiJ      | -                          | <b>C</b>  | -         | -         | -         | -         | -         | -         | -          | <b>T</b>   | Diffuse           |

\* Phenotype refers to the band pattern of hemoglobin  $\beta$  protein on isoelectric focusing experiments. Data from literature and databases was compiled to assemble this table.
