# Supplementary material for: Genetic Analysis of Hematological Parameters in Incipient Lines of the Collaborative Cross
Source: Oxford University Press journal article supplement (doi:10.1534/g3.111.001776), 2012-02-01
Supplement: 157_tables6.pdf [file 157_tables6.pdf]

Table S6 MCV (fL) Among Pre-CC mice and Founder Strains as a Function of *Hbb-b1/b2* Single versus *Diffuse* Genotypes

| Founder Allele           | n  | Founder |       | p-value                    |
|--------------------------|----|---------|-------|----------------------------|
|                          |    | Pre-CC  | Mice* |                            |
| C57BL/6J (s/s)           | 15 | 46.95   | 45.97 | 0.60                       |
| NOD/ShiLtJ (s/s)         | 10 | 47.23   | 55.90 | <b>2.0x10<sup>-5</sup></b> |
| NZO/HILtJ (s/s)          | 9  | 47.71   | 44.52 | 0.28                       |
| A/J (d/d)                | 12 | 58.68   | 48.62 | <b>8.0x10<sup>-4</sup></b> |
| 129S1/SvImJ (d/d)        | 7  | 58.30   | 62.42 | 0.15                       |
| CAST/EiJ (d/d)           | 9  | 56.82   | 46.32 | <b>1.7x10<sup>-4</sup></b> |
| PWK/PhJ (d/d)            | 9  | 61.53   | 60.84 | 0.58                       |
| WSB/EiJ (d/d)            | 14 | 60.77   | 57.84 | 0.05                       |
| <b>Genotype Averages</b> |    |         |       |                            |
| s/s                      | 40 | 48.15   | 55.93 |                            |
| d/d                      | 69 | 59.45   | 50.46 |                            |

\* Data for founder mice is from Table S1.
