# Supplementary material for: Genetic Analysis of Hematological Parameters in Incipient Lines of the Collaborative Cross
Source: Oxford University Press journal article supplement (doi:10.1534/g3.111.001776), 2012-02-01
Supplement: 157_tables7.pdf [file 157_tables7.pdf]

**Table S7 Regions of Shared Ancestry Identified Using Mouse Genomes Project SNP Data**

| QTL          | Chr | Start     | End       | Range   | Number of SNPs | Strains with region of shared ancestry | Mismatched SNPs |     | Shared SNPs |      | Uniquely Shared SNPs |      |
|--------------|-----|-----------|-----------|---------|----------------|----------------------------------------|-----------------|-----|-------------|------|----------------------|------|
|              |     |           |           |         |                |                                        | <i>n</i>        | %   | <i>n</i>    | %    | <i>n</i>             | %    |
| <i>Mcvq4</i> | 7   | 110959072 | 111086522 | 127450  | 3499           | C57BL/6J<br>NOD/HiLtJ<br>NZO/ShiLtJ    | 27              | 0.8 | 3472        | 99.2 | 1455                 | 41.6 |
| <i>Mcvq5</i> | 14  | 20453181  | 22963216  | 2510035 | 35931          | 129S1/SvlmJ NOD/HiLtJ                  | 457             | 1.3 | 35,474      | 98.7 | 619                  | 1.7  |
| <i>Moq1</i>  | 1   | 92803891  | 92970550  | 166659  | 3357           | A/J<br>WSB/EiJ                         | 76              | 2.3 | 3281        | 97.7 | 9                    | 0.3  |
