# Supplementary material for: Genetic Analysis of Hematological Parameters in Incipient Lines of the Collaborative Cross
Source: Oxford University Press journal article supplement (doi:10.1534/g3.111.001776), 2012-02-01
Supplement: 157_tables9.pdf [file 157_tables9.pdf]

**Table S9 Regression Models of MCV as a Function of Hbb s/d Genotype and Hbb Gene Expression\***

| 1. Hbb gene expression                                           |       |         |
|------------------------------------------------------------------|-------|---------|
| Term                                                             | Beta  | p-value |
| Hbb expression                                                   | -0.02 | 0.99    |
| Intercept                                                        | 55.02 | <0.001  |
| 2. Hbb gene expression and s/d genotype                          |       |         |
| Predictor                                                        | Beta  | p-value |
| Hbb expression                                                   | 1.00  | 0.26    |
| Genotype                                                         | 6.26  | <0.001  |
| Intercept                                                        | 41.88 | <0.001  |
| 3. Hbb gene expression, s/d genotype, and genotype*expression    |       |         |
| Predictor                                                        | Beta  | p-value |
| Hbb expression                                                   | 1.62  | 0.28    |
| Genotype                                                         | 8.89  | 0.10    |
| Genotype*Expression                                              | -0.51 | 0.61    |
| Intercept                                                        | 38.56 | <0.001  |
| 4. Hbb-b1 gene expression                                        |       |         |
| Term                                                             | Beta  | p-value |
| Hbb-b1 expression                                                | 0.00  | 1.00    |
| Intercept                                                        | 54.91 | <0.001  |
| 5. Hbb-b1 and s/d genotype                                       |       |         |
|                                                                  | Beta  | p-value |
| Gene Expression                                                  | 1.20  | 0.08    |
| Genotype                                                         | 6.57  | <0.001  |
| Intercept                                                        | 44.87 | <0.001  |
| 6. Hbb-b1 gene expression, s/d genotype, and genotype*expression |       |         |
|                                                                  | Beta  | p-value |
| Hbb-b1 expression                                                | 1.79  | 0.16    |
| Genotype                                                         | 7.31  | <0.001  |
| Genotype*Expression                                              | -0.43 | 0.58    |
| Intercept                                                        | 43.69 | <0.001  |

\* Note that *Hbb* gene expression (total or Hbb-b1) is expressed as the  $\Delta Ct$  (relative to *Rps29*)  $-\Delta Ct$  as in Figure S3.
